# Supplementary material for: The high enrichment of Geobacter by TiN nanoarray anode catalyst for efficient microbial fuel cells
Source: Royal Society of Chemistry journal article supplement (doi:10.1039/d0ta11788a), 2021-01-01
Supplement: d0ta11788a1.pdf [file d0ta11788a1.pdf]

## High Enrichment of *Geobacter* by TiN Nanoarrays Anode Catalyst for Efficient Microbial Fuel Cells

Da Liu,<sup>ad†</sup> Weicheng Huang,<sup>c†</sup> Qinghuan Chang,<sup>a</sup> Lu Zhang,<sup>d</sup> Ruiwen Wang,<sup>d</sup> Mei Yan,<sup>a\*</sup> Hongxue Meng,<sup>b\*</sup> Bin Yang<sup>c</sup> and Chongshen Guo,<sup>a\*</sup>

- a. *School of Chemistry and Chemical Engineering, Key Laboratory of Micro-systems and Micro-structures Manufacturing, Ministry of Education, Harbin Institute of Technology, Harbin, 150001, China*
- b. *Harbin medical university cancer hospital, Harbin 150080, China*
- c. *School of Instrumentation Science and Engineering, Harbin Institute of Technology, Harbin, 150001, China*
- d. *School of Life Science and Technology, Harbin Institute of Technology, Harbin, 150001, China*

\* Corresponding authors.

E-mail addresses: [yanmei@hit.edu.cn](mailto:yanmei@hit.edu.cn) (M. Yan),

[chongshenguo@hit.edu.cn](mailto:chongshenguo@hit.edu.cn) (C. S. Guo), [menghongxue15@163.com](mailto:menghongxue15@163.com) (H. X.

Meng)

† Da Liu and Weicheng Huang contributed equally to this work.

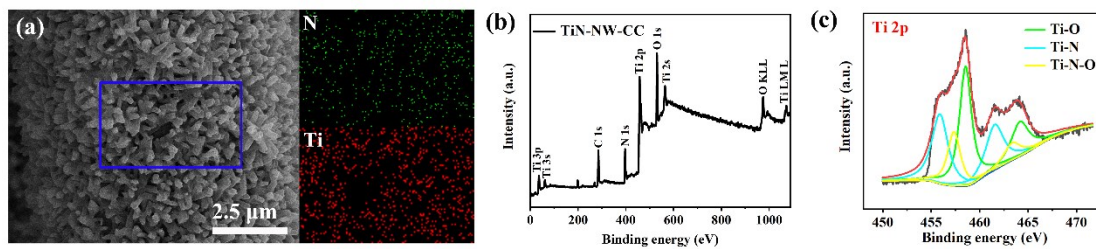

Fig. S1. (a) SEM image and the corresponding Energy dispersive X-ray spectroscopy mapping of TiN-NA-CC. (b) The full-range of XPS spectra. (c) High-resolution of Ti 2p XPS spectrum.

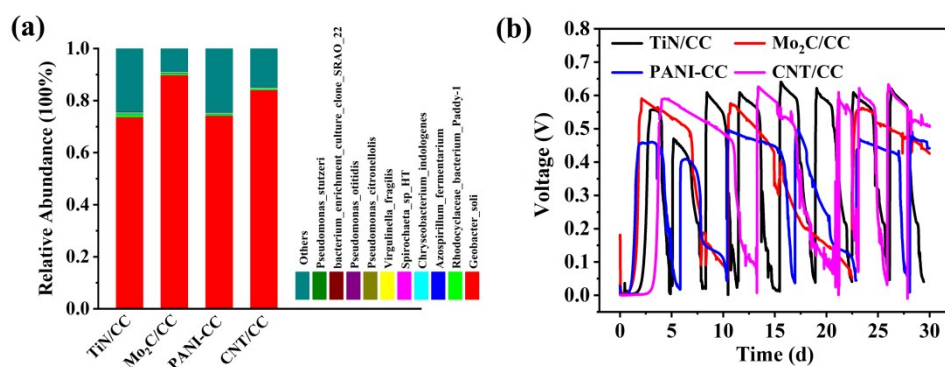

Fig. S2. (a) Microbial community structure of MFCs biofilm; (b) output voltages of MFCs based on different anodes.

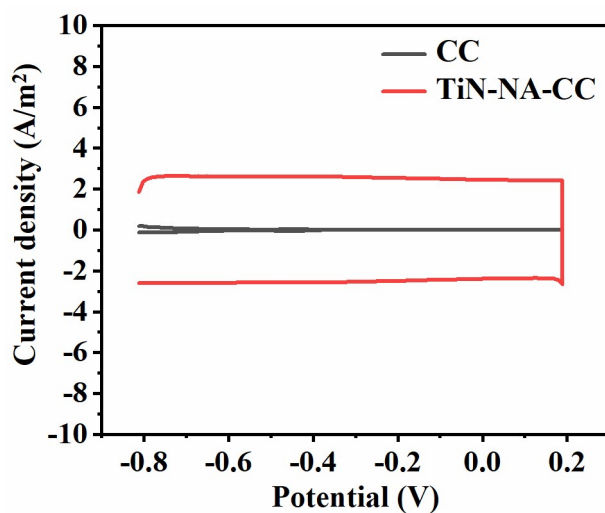

Fig. S3. DPV of bare TiN-NA-CC and CC anodes performed in fresh anolyte (vs. Ag/AgCl)
